# Supplementary material for: A spike sorting toolbox for up to thousands of electrodes validated with ground truth recordings in vitro and in vivo
Source: eLife journal article supplement (doi:10.7554/elife.34518), 2018-03-20
Supplement: supp [file elife-34518-supp-v1.zip]

Archive with 2 entries (2 files):
- elife_poa_e34518_Figure_1_figure_supplement_1.pdf
- elife_poa_e34518_Transparent_Reporting_File.pdf
