# Supplementary material for: A spike sorting toolbox for up to thousands of electrodes validated with ground truth recordings in vitro and in vivo
Source: eLife journal article supplement (doi:10.7554/elife.34518), 2018-03-20

**AA**

Electrode 1

Electrode 2

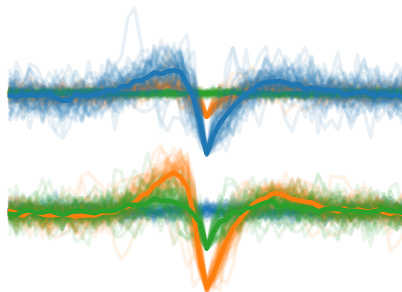

Peak voltage on Electrode 1

Peak voltage on Electrode 2

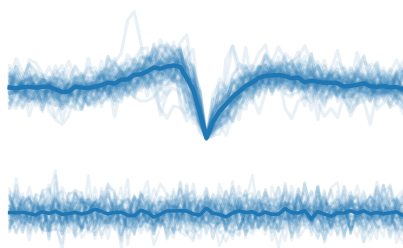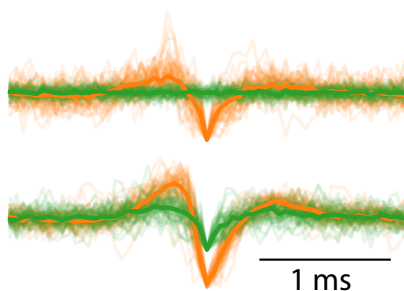**B****B**

Projection and clustering

PC 2

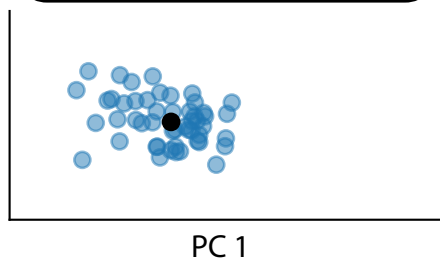

PC 1

Projection and clustering

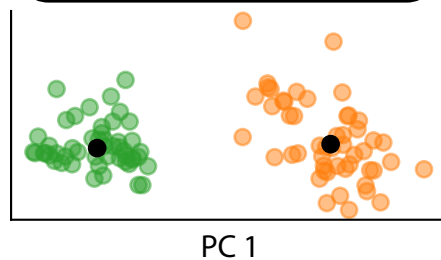

PC 1

**C**

Template Extraction

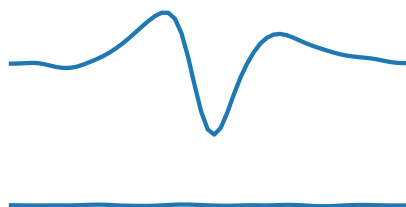

Template Extraction

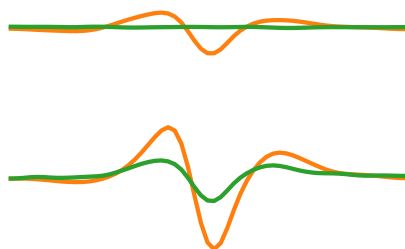

Supplement: supp [file elife-34518-supp-v1.zip]
